# Supplementary material for: Data Augmentation Generated by Generative Adversarial Network for Small Sample Datasets Clustering
Source: Springer Nature journal article supplement (doi:10.1007/s11063-023-11315-z), 2023-06-09
Supplement: 11063_2023_11315_MOESM1_ESM.pdf [file 11063_2023_11315_MOESM1_ESM.pdf]

# Supplementary materials

Hui Yu<sup>a,\*</sup>, QiaoFeng Wang<sup>a</sup>, JianYu Shi<sup>b,\*</sup>

<sup>a</sup> School of Computer Science, Northwestern Polytechnical University, Xi'an 710072, China

<sup>b</sup> School of Life Sciences, Northwestern Polytechnical University, Xi'an 710072, China

The supplementary material contains the evaluation metrics used in the experiment and the experimental results on the other five datasets.

## 1 Evaluation Metrics

We evaluate the clustering performance with five standard clustering evaluation metrics, i.e, Accuracy (ACC), F-measure (F1), Jaccard Index (JI), Precision and Recall. The brief introduction of the five indices is given below.

Accuracy defines the ratio of the number of correctly predicted samples to the total number of predicted samples, expressed as:

$$Accuracy = \frac{TP + TN}{TP + FP + TN + FN} \quad (1)$$

where TP, FP, TN and FN are the values of the confusion matrix in classification, which denote the correct instances, false positive examples, correct negative examples and false negative examples, respectively.

Precision refers to the ratio of the number of correctly predicted positive samples to the number of all predicted positive samples, expressed as:

$$Precision = \frac{TP}{TP + FP} \quad (2)$$

Recall refers to the ratio of the number of positive samples predicted by the model to the actual number of positive samples, expressed as:

$$Recall = \frac{TP}{TP + FN} \quad (3)$$

F1 combines the two indicators of accuracy and recall rate. Only when the accuracy and recall rate is relatively high can the model get a better F1 value, which is defined as:

$$F1 = \frac{2 \times Precision \times Recall}{Precision + Recall} = \frac{2 \times TP}{2 \times TP + FP + FN} \quad (4)$$

The Jaccard index is used to quantify the similarity between two sets, and the value ranges from 0 to 1, where the larger the value, the more similar the two sets are, specifically expressed as:

$$JI(A, B) = \frac{|A \cap B|}{|A \cup B|} = \frac{TP}{TP + FP + FN} \quad (5)$$

---

\*Corresponding author: huiyu@nwpu.edu.cn, jianyushi@nwpu.edu.cn

## 2 Performance results

This section provides additional information including the 2 real datasets and 3 artificial datasets (see Table S1) and the performance results of the above five datasets(see Table S2~Table S6). Each table corresponds to the evaluation results on one dataset, and the best results are highlighted in bold and the minor results are underlined. According to the results, GMM\_WGAN performs best compared to other data augmentation methods under all metrics on the five datasets.

**Table. S1.** Relevant information of the five datasets

| Type                  | Dataset   | Data size | Dimension | Cluster |
|-----------------------|-----------|-----------|-----------|---------|
| real<br>dataset       | Wine      | 178       | 13        | 3       |
|                       | Seeds     | 210       | 7         | 3       |
|                       | Thyroid   | 215       | 5         | 3       |
| artificial<br>dataset | Pathbased | 300       | 2         | 3       |
|                       | R15       | 600       | 2         | 15      |

**Table. S2.** Thyroid dataset

| Algorithm | Model            | ACC            | F1             | JI             | Precision      | Recall         |
|-----------|------------------|----------------|----------------|----------------|----------------|----------------|
| DPC       | None             | 0.76168        | 0.69556        | 0.58414        | 0.82245        | 0.76168        |
|           | SMOTE            | 0.7757         | <u>0.73084</u> | 0.61382        | 0.78573        | 0.7757         |
|           | ADASYN           | <u>0.7907</u>  | 0.72722        | 0.64382        | 0.69033        | <u>0.7907</u>  |
|           | GAN              | 0.76279        | 0.69688        | 0.58577        | 0.82298        | 0.76279        |
|           | WGAN             | 0.73488        | 0.65185        | 0.54277        | 0.80789        | 0.73488        |
|           | <u>EWGAN</u>     | 0.75426        | 0.67452        | 0.55733        | 0.81457        | 0.75382        |
|           | <u>PCWGAN-GP</u> | 0.77459        | 0.69344        | <u>0.57248</u> | <u>0.83682</u> | 0.7734         |
|           | GMM_WGAN         | <b>0.81395</b> | <b>0.75937</b> | <b>0.66707</b> | <b>0.85312</b> | <b>0.81395</b> |
| k_means   | None             | 0.88785        | 0.87713        | 0.79126        | 0.90341        | 0.88785        |
|           | SMOTE            | 0.88785        | 0.87713        | 0.79126        | 0.90341        | 0.88785        |
|           | ADASYN           | 0.88837        | 0.87768        | 0.79214        | 0.90377        | 0.88837        |
|           | GAN              | 0.87442        | 0.85732        | 0.76829        | 0.89098        | 0.87442        |
|           | WGAN             | 0.89302        | 0.88366        | 0.80027        | 0.90725        | 0.89302        |
|           | <u>EWGAN</u>     | 0.89945        | 0.88945        | 0.81456        | 0.9147         | 0.90345        |
|           | <u>PCWGAN-GP</u> | <u>0.90366</u> | <u>0.89525</u> | <u>0.81963</u> | <u>0.91845</u> | <u>0.90734</u> |
|           | GMM_WGAN         | <b>0.91163</b> | <b>0.90581</b> | <b>0.83319</b> | <b>0.92156</b> | <b>0.91163</b> |
| FCM       | None             | 0.90654        | 0.89774        | 0.82414        | 0.9176         | 0.90654        |
|           | SMOTE            | 0.90654        | 0.89774        | 0.82414        | 0.9176         | 0.90654        |
|           | ADASYN           | 0.90698        | 0.89819        | 0.8249         | 0.91792        | 0.90698        |
|           | GAN              | 0.87907        | 0.86207        | 0.77627        | 0.89303        | 0.87907        |
|           | WGAN             | 0.89767        | 0.88859        | 0.80844        | 0.91076        | 0.89767        |
|           | <u>EWGAN</u>     | 0.91456        | 0.90571        | 0.83257        | 0.93642        | 0.91458        |
|           | <u>PCWGAN-GP</u> | <u>0.93118</u> | <u>0.92691</u> | <u>0.85329</u> | <u>0.94657</u> | <u>0.9375</u>  |
|           | GMM_WGAN         | <b>0.96279</b> | <b>0.96208</b> | <b>0.92777</b> | <b>0.96377</b> | <b>0.96279</b> |
|           | None             | <u>0.87383</u> | <u>0.85454</u> | <u>0.76716</u> | <u>0.89077</u> | <u>0.87383</u> |
|           | SMOTE            | 0.86449        | 0.84478        | 0.75105        | 0.88656        | 0.86449        |

Table. S2 (continued)

| Algorithm | Model                     | ACC            | F1             | JI             | Precision      | Recall         |
|-----------|---------------------------|----------------|----------------|----------------|----------------|----------------|
| BIRCH     | ADASYN                    | 0.86977        | 0.84809        | 0.76002        | 0.89025        | 0.86977        |
|           | GAN                       | 0.84651        | 0.82621        | 0.7207         | 0.87419        | 0.84651        |
|           | WGAN                      | 0.86512        | 0.84099        | 0.75226        | 0.88274        | 0.86512        |
|           | <a href="#">EWGAN</a>     | 0.86834        | 0.84357        | 0.75845        | 0.88632        | 0.86457        |
|           | <a href="#">PCWGAN-GP</a> | 0.86956        | 0.84123        | 0.75023        | 0.88945        | 0.86835        |
|           | GMM_WGAN                  | <b>0.87442</b> | <b>0.8551</b>  | <b>0.76799</b> | <b>0.89358</b> | <b>0.87442</b> |
| DBSCAN    | None                      | <u>0.80841</u> | 0.77835        | 0.67708        | 0.81387        | 0.80841        |
|           | SMOTE                     | 0.78972        | 0.75346        | 0.64919        | 0.78497        | 0.78972        |
|           | ADASYN                    | 0.8093         | <u>0.77935</u> | <u>0.67846</u> | <u>0.81462</u> | <u>0.8093</u>  |
|           | GAN                       | 0.77674        | 0.73283        | 0.62849        | 0.76322        | 0.77674        |
|           | WGAN                      | 0.73023        | 0.64734        | 0.54412        | 0.7223         | 0.73023        |
|           | <a href="#">EWGAN</a>     | 0.75346        | 0.66924        | 0.5627         | 0.7472         | 0.75139        |
|           | <a href="#">PCWGAN-GP</a> | 0.76328        | 0.68245        | 0.58231        | 0.76248        | 0.7824         |
|           | GMM_WGAN                  | <b>0.8093</b>  | <b>0.78086</b> | <b>0.70272</b> | <b>0.85277</b> | <b>0.8093</b>  |

Table. S3. Wine dataset

| Algorithm | Model                     | ACC            | F1             | JI             | Precision      | Recall         |
|-----------|---------------------------|----------------|----------------|----------------|----------------|----------------|
| DPC       | None                      | 0.88136        | 0.87691        | 0.78389        | 0.90254        | 0.88136        |
|           | SMOTE                     | 0.96045        | 0.96013        | 0.9236         | 0.96315        | 0.96045        |
|           | ADASYN                    | <u>0.96629</u> | <u>0.96632</u> | <u>0.93505</u> | <u>0.96745</u> | <u>0.96629</u> |
|           | GAN                       | 0.8427         | 0.83408        | 0.72271        | 0.88001        | 0.8427         |
|           | WGAN                      | 0.86517        | 0.8586         | 0.76344        | 0.89585        | 0.86517        |
|           | <a href="#">EWGAN</a>     | 0.90135        | 0.91493        | 0.82451        | 0.90354        | 0.88341        |
|           | <a href="#">PCWGAN-GP</a> | 0.91495        | 0.93023        | 0.83492        | 0.92958        | 0.90352        |
|           | GMM_WGAN                  | <b>0.98315</b> | <b>0.9831</b>  | <b>0.96684</b> | <b>0.98369</b> | <b>0.98315</b> |
| k_means   | None                      | 0.9548         | 0.95455        | 0.91375        | 0.95895        | 0.9548         |
|           | SMOTE                     | <u>0.96045</u> | 0.96006        | <u>0.92336</u> | <u>0.96291</u> | <u>0.96045</u> |
|           | ADASYN                    | 0.95506        | 0.9548         | 0.91423        | 0.95917        | 0.95506        |
|           | GAN                       | 0.88764        | 0.88327        | 0.7931         | 0.90546        | 0.88764        |
|           | WGAN                      | 0.94944        | 0.94904        | 0.90366        | 0.95191        | 0.94944        |
|           | <a href="#">EWGAN</a>     | 0.95143        | 0.95342        | 0.91443        | 0.95823        | 0.95421        |
|           | <a href="#">PCWGAN-GP</a> | 0.95932        | <u>0.96025</u> | 0.92054        | 0.96023        | 0.96023        |
|           | GMM_WGAN                  | <b>0.96629</b> | <b>0.96609</b> | <b>0.93468</b> | <b>0.96839</b> | <b>0.96629</b> |
| FCM       | None                      | 0.94915        | 0.94851        | 0.90243        | 0.95328        | 0.94915        |
|           | SMOTE                     | 0.9548         | 0.95428        | 0.9128         | 0.958          | 0.9548         |
|           | ADASYN                    | 0.95506        | 0.95462        | <u>0.91358</u> | 0.95852        | 0.95506        |
|           | GAN                       | 0.85955        | 0.85195        | 0.74587        | 0.88632        | 0.85955        |
|           | WGAN                      | 0.94382        | 0.9432         | 0.89304        | 0.94673        | 0.94382        |
|           | <a href="#">EWGAN</a>     | 0.95421        | 0.95131        | 0.90341        | 0.95316        | 0.95429        |
|           | <a href="#">PCWGAN-GP</a> | <u>0.95854</u> | <u>0.95942</u> | 0.90831        | <u>0.95941</u> | <u>0.95924</u> |

Table. S3 (continued)

| Algorithm | Model            | ACC            | F1             | JI             | Precision      | Recall         |
|-----------|------------------|----------------|----------------|----------------|----------------|----------------|
|           | GMM_WGAN         | <b>0.96067</b> | <b>0.96031</b> | <b>0.92389</b> | <b>0.96322</b> | <b>0.96067</b> |
| BIRCH     | None             | 0.9774         | 0.97742        | 0.95587        | 0.97785        | 0.9774         |
|           | SMOTE            | 0.96045        | 0.96063        | 0.92465        | 0.96262        | 0.96045        |
|           | ADASYN           | 0.97753        | 0.9776         | <u>0.95669</u> | 0.97804        | <u>0.97753</u> |
|           | GAN              | 0.97753        | 0.97753        | 0.95657        | 0.97753        | 0.97753        |
|           | WGAN             | 0.97191        | 0.97203        | 0.94594        | 0.97339        | 0.97191        |
|           | <u>EWGAN</u>     | 0.97831        | 0.97431        | 0.93851        | <u>0.97932</u> | 0.97002        |
|           | <u>PCWGAN-GP</u> | <u>0.97934</u> | <u>0.97923</u> | 0.94025        | 0.97314        | 9.97423        |
|           | GMM_WGAN         | <b>0.98315</b> | <b>0.98318</b> | <b>0.96698</b> | <b>0.98352</b> | <b>0.98315</b> |
| DBSCAN    | None             | 0.70621        | 0.67906        | 0.54586        | <u>0.76971</u> | 0.70621        |
|           | SMOTE            | 0.70621        | 0.69548        | 0.55479        | 0.75243        | 0.70621        |
|           | ADASYN           | 0.69663        | 0.66638        | 0.5364         | 0.76486        | 0.69663        |
|           | GAN              | 0.70787        | 0.70725        | 0.54863        | 0.75509        | 0.70787        |
|           | WGAN             | 0.71348        | 0.70285        | 0.56245        | 0.75159        | 0.71348        |
|           | <u>EWGAN</u>     | <u>0.71495</u> | 0.70534        | 0.56331        | 0.76421        | <u>0.71954</u> |
|           | <u>PCWGAN-GP</u> | 0.71007        | <u>0.70834</u> | <u>0.56539</u> | 0.76902        | 0.71494        |
|           | GMM_WGAN         | <b>0.72958</b> | <b>0.71021</b> | <b>0.56823</b> | <b>0.83866</b> | <b>0.72958</b> |

Table. S4. Seeds dataset

| Algorithm | Model            | ACC            | F1             | JI             | Precision      | Recall         |
|-----------|------------------|----------------|----------------|----------------|----------------|----------------|
| DPC       | None             | 0.90431        | 0.9031         | 0.82698        | 0.90856        | 0.90431        |
|           | SMOTE            | 0.92344        | <u>0.92288</u> | <u>0.85914</u> | 0.92457        | 0.92344        |
|           | ADASYN           | 0.92381        | 0.92223        | 0.85783        | <u>0.92915</u> | <u>0.92381</u> |
|           | GAN              | 0.90952        | 0.9082         | 0.83421        | 0.91235        | 0.90952        |
|           | WGAN             | 0.9            | 0.90001        | 0.82045        | 0.90584        | 0.9            |
|           | <u>EWGAN</u>     | <u>0.91345</u> | 0.91464        | 0.84236        | 0.91356        | 0.91694        |
|           | <u>PCWGAN-GP</u> | 0.91405        | 0.91851        | 0.84813        | 0.91742        | 0.91853        |
|           | GMM_WGAN         | <b>0.93333</b> | <b>0.93305</b> | <b>0.87553</b> | <b>0.93302</b> | <b>0.93333</b> |
| k_means   | None             | 0.88995        | 0.88996        | 0.80414        | 0.89263        | 0.88995        |
|           | SMOTE            | 0.88995        | 0.88996        | 0.80414        | 0.89263        | 0.88995        |
|           | ADASYN           | 0.89048        | 0.89049        | 0.80489        | 0.89315        | 0.89048        |
|           | GAN              | 0.89524        | 0.89586        | 0.8131         | 0.8989         | 0.89524        |
|           | WGAN             | 0.89048        | 0.89049        | 0.80489        | 0.89315        | 0.89048        |
|           | <u>EWGAN</u>     | 0.90235        | 0.90356        | 0.82464        | 0.90452        | 0.90453        |
|           | <u>PCWGAN-GP</u> | <u>0.91452</u> | <u>0.90934</u> | <u>0.8253</u>  | <u>0.90843</u> | <u>0.91043</u> |
|           | GMM_WGAN         | <b>0.92857</b> | <b>0.92861</b> | <b>0.86775</b> | <b>0.92951</b> | <b>0.92857</b> |
| FCM       | None             | 0.89952        | 0.89972        | 0.81959        | 0.90193        | 0.89952        |
|           | SMOTE            | 0.89952        | 0.89972        | 0.81959        | 0.90193        | 0.89952        |
|           | ADASYN           | 0.9            | 0.90019        | 0.82028        | 0.90238        | 0.9            |
|           | GAN              | 0.90476        | 0.9058         | <u>0.82917</u> | <u>0.91027</u> | <u>0.90476</u> |
|           | WGAN             | 0.88571        | 0.88581        | 0.79735        | 0.88899        | 0.88571        |

Table. S4 (continued)

| Algorithm | Model                     | ACC            | F1             | JI             | Precision      | Recall         |
|-----------|---------------------------|----------------|----------------|----------------|----------------|----------------|
|           | <a href="#">EWGAN</a>     | 0.90351        | 0.90352        | 0.81344        | 0.89341        | 0.89344        |
|           | <a href="#">PCWGAN-GP</a> | <u>0.90842</u> | <u>0.90824</u> | 0.82049        | 0.90452        | 0.90342        |
|           | GMM_WGAN                  | <b>0.92381</b> | <b>0.92346</b> | <b>0.85926</b> | <b>0.92336</b> | <b>0.92381</b> |
| BIRCH     | None                      | 0.88995        | 0.8869         | 0.80184        | 0.89641        | 0.88995        |
|           | SMOTE                     | 0.90431        | 0.90159        | 0.82496        | <u>0.91428</u> | 0.90431        |
|           | ADASYN                    | 0.90476        | 0.90376        | <u>0.82732</u> | 0.90448        | 0.90476        |
|           | GAN                       | 0.88571        | 0.88127        | 0.79368        | 0.89997        | 0.88571        |
|           | WGAN                      | 0.9            | 0.89675        | 0.81693        | 0.91008        | 0.9            |
|           | <a href="#">EWGAN</a>     | 0.90352        | 0.90034        | 0.81945        | 0.90942        | 0.90301        |
|           | <a href="#">PCWGAN-GP</a> | <u>0.90934</u> | <u>0.90523</u> | 0.82493        | 0.90923        | <u>0.9094</u>  |
|           | GMM_WGAN                  | <b>0.91429</b> | <b>0.91349</b> | <b>0.84255</b> | <b>0.9151</b>  | <b>0.91429</b> |
| DBSCAN    | None                      | 0.34928        | 0.19829        | 0.12859        | <u>0.66779</u> | 0.34928        |
|           | SMOTE                     | 0.4067         | 0.31332        | 0.19784        | 0.66655        | 0.4067         |
|           | ADASYN                    | 0.4            | 0.31044        | 0.19436        | 0.65711        | 0.4            |
|           | GAN                       | <u>0.58095</u> | <u>0.58014</u> | <u>0.42094</u> | 0.65554        | <u>0.58095</u> |
|           | WGAN                      | 0.36667        | 0.2484         | 0.15634        | 0.58906        | 0.36667        |
|           | <a href="#">EWGAN</a>     | 0.48392        | 0.2753         | 0.18439        | 0.61894        | 0.40282        |
|           | <a href="#">PCWGAN-GP</a> | 0.50283        | 0.3053         | 0.20451        | 0.6239         | 0.4394         |
|           | GMM_WGAN                  | <b>0.64286</b> | <b>0.63494</b> | <b>0.48877</b> | <b>0.67192</b> | <b>0.64286</b> |

Table. S5. Pathbased dataset

| Algorithm | Model                     | ACC            | F1             | JI             | Precision      | Recall         |
|-----------|---------------------------|----------------|----------------|----------------|----------------|----------------|
| DPC       | None                      | 0.72           | 0.67056        | 0.53086        | 0.80189        | 0.72           |
|           | SMOTE                     | 0.72575        | 0.67929        | 0.53975        | 0.80637        | 0.72575        |
|           | ADASYN                    | 0.70667        | 0.64987        | 0.51309        | 0.79665        | 0.70667        |
|           | GAN                       | <u>0.75333</u> | <u>0.72877</u> | <u>0.58558</u> | 0.80388        | <u>0.75333</u> |
|           | WGAN                      | 0.69333        | 0.62746        | 0.49255        | 0.79095        | 0.69333        |
|           | <a href="#">EWGAN</a>     | 0.70341        | 0.65331        | 0.51492        | 0.81344        | 0.71342        |
|           | <a href="#">PCWGAN-GP</a> | 0.72492        | 0.67321        | 0.53482        | <u>0.84239</u> | 0.73943        |
|           | GMM_WGAN                  | <b>0.85667</b> | <b>0.85584</b> | <b>0.75462</b> | <b>0.8917</b>  | <b>0.85667</b> |
| k_means   | None                      | 0.73244        | 0.68897        | 0.5488         | 0.80782        | 0.73244        |
|           | SMOTE                     | <u>0.73244</u> | <u>0.68897</u> | 0.5488         | <u>0.80782</u> | <u>0.73244</u> |
|           | ADASYN                    | 0.73           | 0.68591        | 0.54541        | 0.80678        | 0.73           |
|           | GAN                       | 0.72333        | 0.68034        | 0.53807        | 0.79332        | 0.72333        |
|           | WGAN                      | 0.72667        | 0.68525        | 0.54347        | 0.78737        | 0.72667        |
|           | <a href="#">EWGAN</a>     | 0.7284         | 0.68493        | <u>0.54925</u> | 0.78349        | 0.72941        |
|           | <a href="#">PCWGAN-GP</a> | 0.72945        | 0.68831        | 0.54831        | 0.78942        | 0.7284         |
|           | GMM_WGAN                  | <b>0.73333</b> | <b>0.691</b>   | <b>0.55056</b> | <b>0.80848</b> | <b>0.73333</b> |
|           | None                      | 0.73579        | 0.69606        | 0.5553         | 0.80042        | 0.73579        |
|           | SMOTE                     | 0.73579        | 0.69606        | 0.5553         | 0.80042        | 0.73579        |
|           | ADASYN                    | 0.73           | 0.68804        | 0.54692        | 0.79733        | 0.73           |

Table. S5 (continued)

| Algorithm | Model                     | ACC            | F1             | JI             | Precision      | Recall         |
|-----------|---------------------------|----------------|----------------|----------------|----------------|----------------|
| FCM       | GAN                       | 0.58667        | 0.56564        | 0.40774        | 0.58562        | 0.58667        |
|           | WGAN                      | 0.72333        | 0.68446        | 0.54157        | 0.77097        | 0.72333        |
|           | <a href="#">EWGAN</a>     | 0.74832        | 0.69298        | 0.56924        | 0.79342        | 0.75492        |
|           | <a href="#">PCWGAN-GP</a> | <u>0.75392</u> | <u>0.71982</u> | <u>0.58231</u> | <u>0.81331</u> | <u>0.76942</u> |
|           | GMM_WGAN                  | <b>0.78195</b> | <b>0.79188</b> | <b>0.71133</b> | <b>0.85695</b> | <b>0.78195</b> |
| BIRCH     | None                      | 0.70903        | 0.65337        | 0.51759        | 0.79857        | 0.70903        |
|           | SMOTE                     | 0.73244        | 0.69643        | 0.55552        | 0.79258        | 0.73244        |
|           | ADASYN                    | 0.74333        | 0.7059         | 0.5658         | <u>0.81372</u> | <u>0.74333</u> |
|           | GAN                       | 0.72667        | 0.68123        | 0.54102        | 0.80661        | 0.72667        |
|           | WGAN                      | 0.72           | 0.6971         | 0.54425        | 0.79168        | 0.72           |
|           | <a href="#">EWGAN</a>     | 0.7432         | 0.70392        | 0.5621         | 0.80214        | 0.7394         |
|           | <a href="#">PCWGAN-GP</a> | <u>0.7549</u>  | <u>0.71394</u> | <u>0.57491</u> | 0.80984        | 0.7293         |
|           | GMM_WGAN                  | <b>0.76</b>    | <b>0.72952</b> | <b>0.59027</b> | <b>0.82226</b> | <b>0.76</b>    |
| DBSCAN    | None                      | 0.36455        | 0.23495        | 0.14989        | 0.4743         | 0.36455        |
|           | SMOTE                     | 0.36           | 0.22651        | 0.14411        | 0.47411        | 0.36           |
|           | ADASYN                    | 0.34           | 0.33304        | 0.2663         | 0.40767        | 0.34           |
|           | GAN                       | 0.42333        | 0.33357        | 0.22172        | 0.48839        | 0.42333        |
|           | WGAN                      | <u>0.46667</u> | <u>0.3861</u>  | 0.26805        | <u>0.49139</u> | <u>0.46667</u> |
|           | <a href="#">EWGAN</a>     | 0.4665         | 0.3814         | 0.26354        | 0.48953        | 0.46667        |
|           | <a href="#">PCWGAN-GP</a> | 0.46667        | 0.3777         | <u>0.26891</u> | 0.48995        | 0.46667        |
|           | GMM_WGAN                  | <b>0.46667</b> | <b>0.38717</b> | <b>0.26909</b> | <b>0.49242</b> | <b>0.46667</b> |

Table. S6. R15 dataset

| Algorithm | Model                     | ACC            | F1             | JI             | Precision      | Recall         |
|-----------|---------------------------|----------------|----------------|----------------|----------------|----------------|
| DPC       | None                      | 0.99666        | 0.99666        | 0.9934         | 0.99674        | 0.99666        |
|           | SMOTE                     | 0.99666        | 0.99666        | 0.9934         | 0.99674        | 0.99666        |
|           | ADASYN                    | 0.99667        | 0.99667        | 0.99341        | 0.99675        | 0.99667        |
|           | GAN                       | 0.99333        | 0.99333        | 0.98691        | 0.99357        | 0.99333        |
|           | WGAN                      | 0.99167        | 0.99166        | 0.98365        | 0.99191        | 0.99167        |
|           | <a href="#">EWGAN</a>     | 0.99667        | 0.99667        | 0.99341        | 0.99675        | 0.99667        |
|           | <a href="#">PCWGAN-GP</a> | <u>0.99667</u> | <u>0.99667</u> | <u>0.99341</u> | <u>0.99675</u> | <u>0.99667</u> |
|           | GMM_WGAN                  | <b>0.99667</b> | <b>0.99667</b> | <b>0.99341</b> | <b>0.99675</b> | <b>0.99667</b> |
| k_means   | None                      | 0.99667        | 0.99667        | 0.99341        | 0.99675        | 0.99667        |
|           | SMOTE                     | 0.99666        | 0.99666        | 0.9934         | 0.99674        | 0.99666        |
|           | ADASYN                    | 0.99667        | 0.99667        | 0.99341        | 0.99675        | 0.99667        |
|           | GAN                       | 0.99333        | 0.99331        | 0.98691        | 0.99341        | 0.99333        |
|           | WGAN                      | 0.99667        | 0.99667        | 0.99341        | 0.99675        | 0.99667        |
|           | <a href="#">EWGAN</a>     | 0.99667        | 0.99664        | 0.99341        | 0.99675        | 0.99662        |
|           | <a href="#">PCWGAN-GP</a> | <u>0.99667</u> | <u>0.99667</u> | <u>0.99341</u> | <u>0.99679</u> | <u>0.99667</u> |
|           | GMM_WGAN                  | <b>0.99667</b> | <b>0.99669</b> | <b>0.99349</b> | <b>0.99683</b> | <b>0.99667</b> |
| None      | 0.99667                   | 0.99667        | 0.99341        | 0.99675        | 0.99667        |                |

Table. S6 (continued)

| Algorithm | Model                     | ACC            | F1             | JI             | Precision      | Recall         |
|-----------|---------------------------|----------------|----------------|----------------|----------------|----------------|
| FCM       | SMOTE                     | 0.99666        | 0.99666        | 0.9934         | 0.99674        | 0.99666        |
|           | ADASYN                    | 0.99667        | 0.99667        | 0.99341        | 0.99675        | 0.99667        |
|           | GAN                       | 0.99333        | 0.99331        | 0.98691        | 0.99341        | 0.99333        |
|           | WGAN                      | 0.99667        | 0.99667        | 0.99341        | 0.99675        | 0.99667        |
|           | <a href="#">EWGAN</a>     | 0.99667        | 0.99667        | 0.99341        | 0.99675        | 0.99667        |
|           | <a href="#">PCWGAN-GP</a> | <u>0.99667</u> | <u>0.99667</u> | <u>0.99341</u> | <u>0.99675</u> | <u>0.99667</u> |
|           | GMM_WGAN                  | <b>0.99667</b> | <b>0.99669</b> | <b>0.99349</b> | <b>0.99683</b> | <b>0.99667</b> |
| BIRCH     | None                      | 0.98998        | 0.99           | 0.98044        | 0.99046        | 0.98998        |
|           | SMOTE                     | 0.99165        | 0.99156        | 0.98366        | 0.99201        | 0.99165        |
|           | ADASYN                    | 0.98833        | 0.98844        | 0.97771        | 0.9893         | 0.98833        |
|           | GAN                       | 0.985          | 0.98499        | 0.97122        | 0.98544        | 0.985          |
|           | WGAN                      | 0.98667        | 0.98663        | 0.97412        | 0.9873         | 0.98667        |
|           | <a href="#">EWGAN</a>     | 0.9923         | 0.99281        | <u>0.98999</u> | <u>0.99381</u> | 0.98994        |
|           | <a href="#">PCWGAN-GP</a> | <u>0.9932</u>  | <u>0.99641</u> | 0.98983        | 0.99183        | <u>0.99283</u> |
| GMM_WGAN  | <b>0.995</b>              | <b>0.995</b>   | <b>0.99016</b> | <b>0.99508</b> | <b>0.995</b>   |                |
| DBSCAN    | None                      | 0.90651        | 0.89845        | <u>0.87226</u> | 0.90213        | 0.90651        |
|           | SMOTE                     | 0.90484        | 0.89667        | 0.86905        | 0.90042        | 0.90484        |
|           | ADASYN                    | <u>0.91667</u> | 0.90174        | 0.88171        | 0.89837        | <u>0.91667</u> |
|           | GAN                       | 0.91333        | 0.90064        | 0.87611        | 0.9011         | 0.91333        |
|           | WGAN                      | 0.89           | 0.88634        | 0.8529         | 0.89457        | 0.89           |
|           | <a href="#">EWGAN</a>     | 0.90328        | 0.90129        | 0.86342        | 0.89993        | 0.90138        |
|           | <a href="#">PCWGAN-GP</a> | 0.91384        | <u>0.9039</u>  | 0.86932        | <u>0.9012</u>  | 0.9083         |
| GMM_WGAN  | <b>0.9241</b>             | <b>0.9068</b>  | <b>0.88922</b> | <b>0.90453</b> | <b>0.9241</b>  |                |
